# Supplementary material for: Interactions between L. monocytogenes and P. fluorescens in Dual-Species Biofilms under Simulated Dairy Processing Conditions
Source: PubMed Central journal article supplement (PMC7829993; doi:10.3390/foods10010176), 2021-01-16
Supplement: foods-10-00176-s001.pdf [file foods-10-00176-s001.pdf]

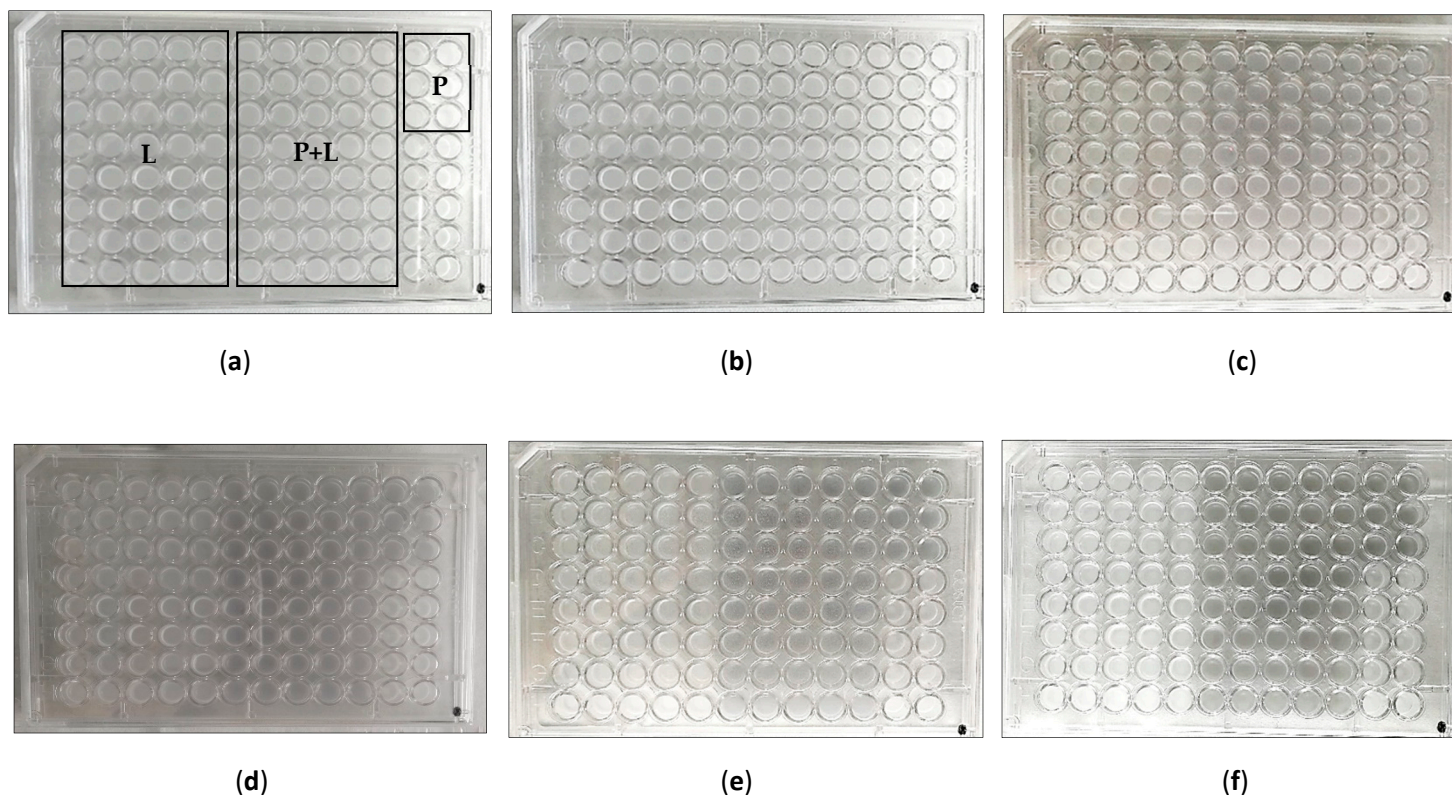

**Figure 1S.** Blue pigment production appearance during the assay of biofilm formation of *L. monocytogenes* strains and *P. fluorescens* pf5 in mono- and dual-species conditions on PS microtitre plates. (a) 0 h; (b) 24 h; (c) 48 h; (d) 72 h; (e) 96 h; (f) 168 h.
